# Supplementary material for: Biophysical and RNA Interference Inhibitory Properties of Oligonucleotides Carrying Tetrathiafulvalene Groups at Terminal Positions
Source: Hindawi journal article supplement (doi:10.1155/2013/650610), 2013-01-01
Supplement: f1 [file 650610.f1.doc]

**Supporting Information**

**Biophysical and RNA Interference Inhibitory Properties of Oligonucleotides Carrying Tetrathiafulvalene Groups at Terminal Positions**

*Sónia Pérez-Rentero#, Alvaro Somoza*§*, Santiago Grijalvo#, Jiří Janoušek*‡*, Martin Bělohradský*‡*, Irena G. Stará*‡*, Ivo Starý*‡*, Ramon Eritja*, #*

#Institute for Advanced Chemistry of Catalonia (IQAC), CSIC, CIBER-BBN Networking Centre on Bioengineering, Biomaterials and Nanomedicine, Jordi Girona 18-26, 08034 Barcelona, Spain.

§IMDEA-Nanociencia, E-28049, Madrid, Spain.

‡ Institute of Organic Chemistry and Biochemistry, v.v.i., Academy of Sciences of the Czech Republic, Flemingovo nám. 2, 16610 Prague 6, Czech Republic.

**Contents**

**Page 3:** Figure S1**:** HPLC profiles of purified oligonucleotides **6** and **7**.

Figure S2: HPLC profiles of purified oligonucleotides **9** and **10**.

Figure S3: HPLC profiles of purified oligonucleotides **15** and **16**.

**Page 4:** Characterization data of oligonucleotides.

**Page 5:** Characterization data of oligonucleotides.

Figure S4: Melting curves of unmodified 15mer duplex **1**+**2** and duplexes carrying a single pyrene (**6**+**2**) or 2,3,4,5,6-pentafluorophenyl (**7**+**2**) group at A) low and B) high salt concentration.

Figure S5: Melting curves of unmodified 15mer duplex **1**+**2** and duplexes carrying hydrophobic groups at opposite sites and at the same duplex site and melting curves of unmodified and modified self complementary duplexes carrying two pyrene or 2,3,4,5,6-pentafluorophenyl units at opposite sites. Buffer: 50mM NaCl, 10 mM sodium phosphate buffer, pH=7.

**Pages 6-10**: NMR spectra of compounds **1b, 2b, 1c** and **2c**.

**Figure S1.** HPLC profiles of purified oligonucleotides A) **6** and B) **7**.

**Figure S2.** HPLC profiles of purified oligonucleotides A) **9** and B) **10**.

**Figure S3.** HPLC profiles of purified oligonucleotides A) **15** and B) **16**

**Characterization data of oligonucleotides.**

**Unmodified**

**Sequence 8**: tR=3.3 min. =258 nm. MALDI-TOF MS *m/z* (negative mode, THAP-CA, [M-H]-) calculated for C116H147N46O70P11 3644.5, found 3640.5). Yield was 15 OD units at 260 nm (69%).

**Sequence 11**: tR=4.2 min. =257 nm. MALDI-TOF MS *m/z* (negative mode, THAP-CA, [M-H]-) calculated for C207H252N91O13P20 6810.3, found 6804.7). Yield was 13.4 OD units at 260 nm (29%).

**Sequence 12**: tR=3.8 min. =260 nm. MALDI-TOF MS *m/z* (negative mode, THAP-CA, [M-H]-) calculated for C194H243N56O154P20 6442.8, found 6436.8). Yield was 15.5 OD units at 260 nm (40%).

**Sequence 13**: tR=3.8 min. =258 nm. MALDI-TOF MS *m/z* (negative mode, THAP-CA, [M-H]-) calculated for C202H251N79O142P20 6677.1, found 6670.2). Yield was 16.8 OD units at 260 nm (39%).

**Sequence 14**: tR=3.9 min. =259 nm. MALDI-TOF MS *m/z* (negative mode, THAP-CA, [M-H]-) calculated for C199H248N70O148P20 6608.0, found 6601.1). Yield was 15.6 OD units at 260 nm (37%).

**PYR- and PFP-modified**

**Sequence 6**: tR=5.4 min. =261, 335 and 349 nm. MALDI-TOF MS *m/z* (negative mode, THAP-CA, [M-H]-) calculated for C167H203N56O94P15 4965.4, found 4960.7). Yield was 8.1 OD units at 260 nm (29%).

**Sequence 7**: tR=4.6 min. =259 nm. MALDI-TOF MS *m/z* (negative mode, THAP-CA, [M-H]-) calculated for C157H194N56O94F5P15 4929.8, found 4923.7). Yield was 7.2 OD units at 260 nm (25%).

**Sequence 9**: tR=6.3 min. =259, 332 and 345 nm. MALDI-TOF MS *m/z* (negative mode, THAP-CA, [M-H]-) calculated for C137H165N47O75P12 4039.4, found 4037.2). Yield was 9.1 OD units at 260 nm (41%).

**Sequence 10**: tR=5.8 min. =257 nm. MALDI-TOF MS *m/z* (negative mode, THAP-CA, [M-H]-) calculated for C127H156N47O75F5P12, 4005.4 found 4001.9). Yield was 6.5 OD units at 260 nm (29%).

**TTF2-modified**

**Sequence 15**: tR=10.3 min. =258 and 330 nm. MALDI-TOF MS *m/z* (negative mode, THAP-CA, [M-H]-) calculated for C232H293N92O141P21S8 7532.6, found 7533.6). Yield was 2.8 OD units at 260 nm (5%).

**Sequence 16**: tR=10.2 min. =261 and 330 nm. MALDI-TOF MS *m/z* (negative mode, THAP-CA, [M-H]-) calculated for C219H284N57O159P21S8 7165.2, found 7167.5). Yield was 3.8 OD units at 260 nm (8%).

**Figure S4**. Melting curves of unmodified 15mer duplex **1**+**2** and duplexes carrying a single pyrene (**6**+**2**) or 2,3,4,5,6-pentafluorophenyl (**7**+**2**) group at A) low and B) high salt concentration.

**Figure S5**. Melting curves of unmodified 15mer duplex **1**+**2** and duplexes carrying hydrophobic groups at A) opposite sites and B) at the same duplex site. C) Melting curves of unmodified self complementary duplex **8** and duplexes carrying two pyrene 2,3,4,5,6-pentafluorophenyl units at opposite sites. Buffer: 50mM NaCl, 10 mM sodium phosphate buffer, pH=7.

1H-NMR spectrum of compound **1b**

13C-NMR spectrum of compound **1b**

1H-NMR spectrum of compound **1c**

19F-NMR spectrum of compound **1c**

13C-NMR spectrum of compound **1c**

1H-NMR spectrum of compound **2b**

13C-NMR spectrum of compound **2b**

1H-NMR spectrum of compound **2c**

19F-NMR spectrum of compound **2c**

13C-NMR spectrum of compound **2c**
